# Supplementary material for: Discrete simulation analysis of COVID-19 and prediction of isolation bed numbers
Source: PeerJ journal article supplement (doi:10.7717/peerj.11629), 2021-06-23

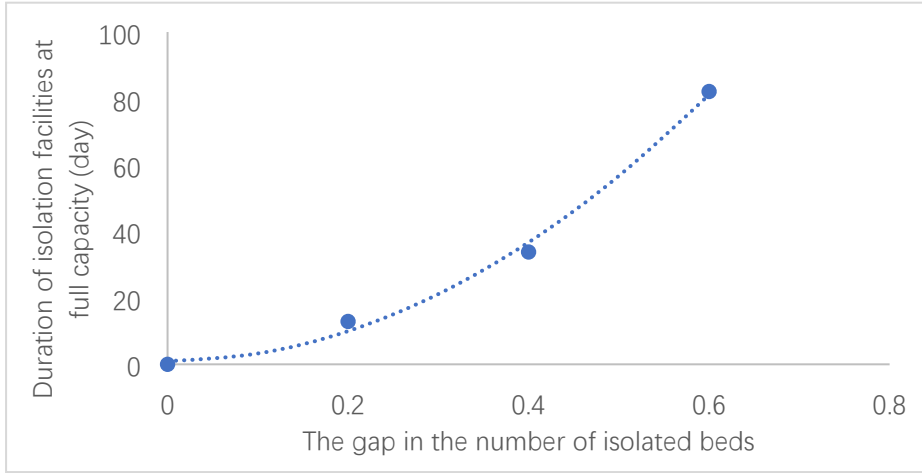

Supplement: Supplementary_Figure_1.pdf [file Supplementary_Figure_1.pdf]
